# Supplementary material for: Role of Granulocyte-Macrophage Colony-Stimulating Factor Production by T Cells during Mycobacterium tuberculosis Infection
Source: PubMed Central journal article supplement (PMC5654932; doi:10.1128/mbio.01514-17), 2017-10-24
Supplement: mbo005173557sf1.pdf [file mbo005173557sf1.pdf]

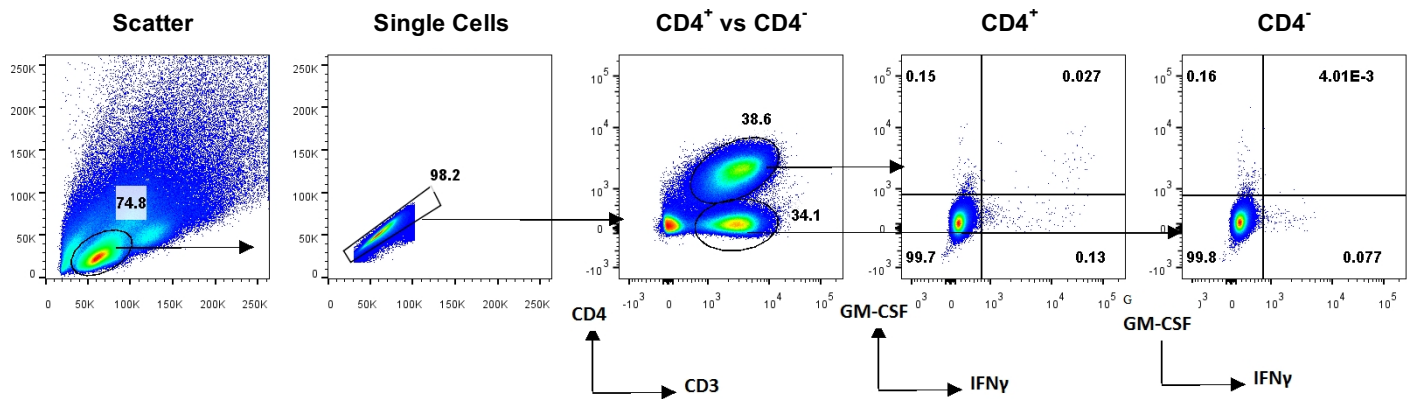

**Supplemental Figure 1: Gating strategy for human PBMC.** Lymphocytes were identified based on typical FSC and SSC pattern, and then singlets were gated to avoid cell clumps. CD4<sup>+</sup> T cells were identified based on their dual staining with antibodies specific for CD3 and CD4. CD4<sup>-</sup> T cells were defined based on positive staining for CD3 and negative staining for CD4.
