# Supplementary material for: Role of Granulocyte-Macrophage Colony-Stimulating Factor Production by T Cells during Mycobacterium tuberculosis Infection
Source: PubMed Central journal article supplement (PMC5654932; doi:10.1128/mbio.01514-17), 2017-10-24
Supplement: mbo005173557st1.pdf [file mbo005173557st1.pdf]

Supplemental Table 1: Statistical analysis of BM chimeras

|                 | Experiment #1 |         | Experiment #2 |        | Combined      |        |
|-----------------|---------------|---------|---------------|--------|---------------|--------|
|                 | Mean $\Delta$ | Signif* | Mean $\Delta$ | Signif | Mean $\Delta$ | Signif |
| WT>WT vs. WT>KO | -0.92         | ns      | -0.89         | ns     | -0.90         | ns     |
| WT>WT vs. KO>WT | -0.18         | ns      | -0.13         | ns     | -0.16         | ns     |
| WT>WT vs. KO>KO | -1.71         | *       | -2.36         | **     | -2.04         | ****   |
| WT>KO vs. KO>WT | 0.73          | ns      | 0.75          | ns     | 0.74          | ns     |
| WT>KO vs. KO>KO | -0.79         | ns      | -1.48         | ns     | -1.13         | *      |
| KO>WT vs. KO>KO | -1.52         | *       | -2.23         | **     | -1.88         | ***    |

\* One-way ANOVA:
